# Supplementary material for: Diagnostic accuracy of conventional oral examination for detecting oral cavity cancer and potentially malignant disorders in patients with clinically evident oral lesions: Systematic review and meta‐analysis
Source: PubMed Central journal article supplement (PMC9306506; doi:10.1002/hed.26992), 2022-01-29
Supplement: HED-44-998-s001.pdf [file HED-44-998-s001.pdf]

## Appendices

### Appendix 1: Example search strategy

This strategy was used for MEDLINE and adapted for the other databases searched (see section 2 of main report for details).

Database: Ovid MEDLINE(R) and Epub Ahead of Print, In-Process & Other Non-Indexed Citations, Daily and Versions(R)

Search Strategy:

- 
- 1 exp Mouth Neoplasms/
  - 2 ((oral or dent\* or mouth) adj3 (cancer\* or precancer\* or malignan\* or premalignan\* or dysplasia)).mp.  
[mp=title, abstract, original title, name of substance word, subject heading word, floating sub-heading word, keyword heading word, organism supplementary concept word, protocol supplementary concept word, rare disease supplementary concept word, unique identifier, synonyms]
  - 3 1 or 2
  - 4 specificity.tw.\*
  - 5 3 and 4
  - 6 biops\*.mp.
  - 7 (discordan\* or concordan\* or reliab\* or concurren\* or accura\* or unreliab\*).mp.
  - 8 3 and 6 and 7
  - 9 5 or 8

-----

*\*McMaster University high precision filter for identifying diagnostic studies*  
([https://hiru.mcmaster.ca/hiru/HIRU\\_Hedges\\_MEDLINE\\_Strategies.aspx](https://hiru.mcmaster.ca/hiru/HIRU_Hedges_MEDLINE_Strategies.aspx))

## Appendix 2: Eligibility criteria for study selection

|                                  | Inclusion                                                                                                                                                                                                                                                            | Exclusion                                                                                                                                                                                                                                                                                                                                                                                                                                                                                                                                          |
|----------------------------------|----------------------------------------------------------------------------------------------------------------------------------------------------------------------------------------------------------------------------------------------------------------------|----------------------------------------------------------------------------------------------------------------------------------------------------------------------------------------------------------------------------------------------------------------------------------------------------------------------------------------------------------------------------------------------------------------------------------------------------------------------------------------------------------------------------------------------------|
| <b>Study design</b>              | <ul style="list-style-type: none"> <li>• Diagnostic accuracy study (cohort study with index test and reference standard)</li> </ul>                                                                                                                                  | <ul style="list-style-type: none"> <li>• Other study designs (not diagnostic accuracy)</li> </ul>                                                                                                                                                                                                                                                                                                                                                                                                                                                  |
| <b>Population</b>                | <ul style="list-style-type: none"> <li>• Patients with oral lesion or oral potentially malignant disorders</li> </ul>                                                                                                                                                | <ul style="list-style-type: none"> <li>• Healthy adults with no visible lesion</li> <li>• Other cancers: see below</li> </ul>                                                                                                                                                                                                                                                                                                                                                                                                                      |
| <b>Condition being diagnosed</b> | <ol style="list-style-type: none"> <li>1) Oral potentially malignant disorders i.e. dysplastic and malignant lesions (including oral cancer, carcinoma in situ and all types of dysplasia: mild, moderate and severe)</li> <li>2) Malignant lesions alone</li> </ol> | <ul style="list-style-type: none"> <li>• Metastases to lymph nodes</li> <li>• Neck cancer / lesions</li> <li>• Thyroid cancer</li> <li>• Laryngeal cancer</li> <li>• Pharyngeal and nasopharyngeal cancer</li> <li>• Salivary gland &amp; parotid cancer</li> <li>• Lip cancer</li> </ul>                                                                                                                                                                                                                                                          |
| <b>Index test</b>                | <ul style="list-style-type: none"> <li>• Conventional oral examination (visual inspection)</li> </ul>                                                                                                                                                                | <ul style="list-style-type: none"> <li>• Other non-invasive adjunctive visual tools e.g. toluidine blue, Vizilite, auto fluorescence spectroscopy etc.</li> <li>• SNB / SLNB</li> <li>• PET / CT / MRI / ultrasound</li> <li>• DNA / RNA / protein markers</li> <li>• FNAC or CNB for salivary gland / parotid tumours</li> <li>• Methods of processing or assessing biopsied tissue, e.g. staining, freezing, cytology, pathologist concordance</li> <li>• Visual inspection by another clinician</li> <li>• Other reference standards</li> </ul> |
| <b>Reference standard</b>        | <ul style="list-style-type: none"> <li>• Biopsy</li> <li>• Full excision of lesion</li> </ul>                                                                                                                                                                        |                                                                                                                                                                                                                                                                                                                                                                                                                                                                                                                                                    |
| <b>Outcome measures</b>          | <ul style="list-style-type: none"> <li>• Sensitivity &amp; specificity</li> <li>• Other diagnostic measures e.g. positive and negative predictive value</li> <li>• Concordance</li> <li>• Accuracy for different types of dental professional</li> </ul>             |                                                                                                                                                                                                                                                                                                                                                                                                                                                                                                                                                    |
| <b>Dates of publication</b>      | <ul style="list-style-type: none"> <li>• 1990 onwards</li> </ul>                                                                                                                                                                                                     | <ul style="list-style-type: none"> <li>• Studies published before 1990</li> </ul>                                                                                                                                                                                                                                                                                                                                                                                                                                                                  |
| <b>Country of study</b>          | <ul style="list-style-type: none"> <li>• Developed countries e.g. UK, Western Europe, Australia, North America, Canada, Japan, South Korea</li> </ul>                                                                                                                | <ul style="list-style-type: none"> <li>• Developing countries and countries with different health system (e.g. Eastern Europe and Middle East e.g. Poland, Romania, Israel)</li> </ul>                                                                                                                                                                                                                                                                                                                                                             |
| <b>Language</b>                  | <ul style="list-style-type: none"> <li>• English, or sufficient English to extract data</li> </ul>                                                                                                                                                                   | <ul style="list-style-type: none"> <li>• Insufficient English to extract data</li> </ul>                                                                                                                                                                                                                                                                                                                                                                                                                                                           |

CNB, core needle biopsy; COE, conventional oral examination; CT, computed tomography; DNA, deoxyribonucleic acid; FNAC, fine needle aspiration cytology; MRI, magnetic resonance imaging; PET, positron emission tomography; RNA, ribonucleic acid; SNB / SLNB, sentinel (lymph) node biopsy; UK, United Kingdom

**Appendix 3: COE vs. biopsy: Summary ROC curve for dysplastic and malignant lesions without Patel et al<sup>33</sup> (N=13 studies)**

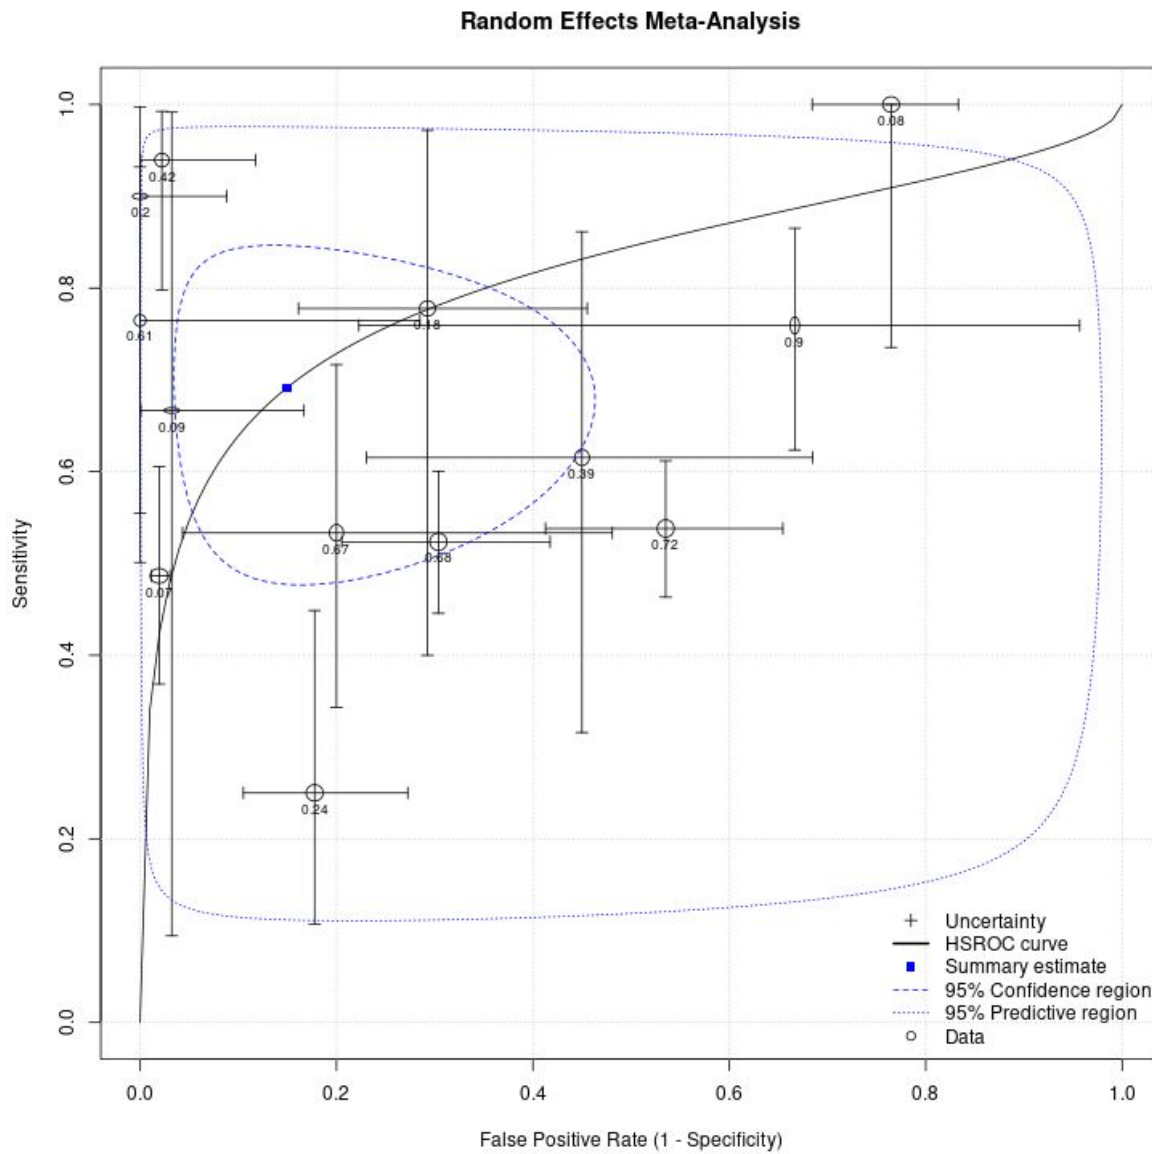

Pooled sensitivity of COE: 70% (95% CI: 55% to 81%)

Pooled specificity of COE: 85% (95% CI: 65% to 95%)
